# Supplementary material for: Mouse liver assembloids model periportal architecture and biliary fibrosis
Source: Nature. 2025 May 29;644(8076):473–82. doi: 10.1038/s41586-025-09183-9 (PMC12350178; doi:10.1038/s41586-025-09183-9)
Supplement: Supplementary file 5 — Supplementary Table 1.1–1.7. [file 41586_2025_9183_MOESM5_ESM.xlsx]

## Sheet: Suppl.Table 1-1 Antibodies,Dyes
Supplementary Table 1-1. List of antibodies and dyes
Primary antibodies	Company	Catalogue number	Identifier	Dilution	Method
Rabbit monoclonal anti‑E‑cadherin (24E10)	Cell Signaling	# 3195	RRID:AB_2291471	1:200	IF organoids
Rat monoclonal anti-E‑cadherin (ECCD‑2)	Thermo Fisher Scientific	# 131900	RRID:AB_2533005	1:500	IF tissue
Rat monoclonal anti-CD13 (ER-BMDM1)	Novus	# NB100-64843	RRID:AB_959651	1:500	IF tissue and organoids
Rat monoclonal anti‑Cytokeratin-19 (TROMA-III)	Sigma-Aldrich	# MABT913	RRID:AB_2892523	1:200	IF tissue and organoids
Rabbit polyclonal anti‑ZO‑1	Thermo Fisher Scientific	# 40-2200	RRID:AB_2533456	1:200	IF organoids
Goat polyclonal anti‑Albumin	Novus	# NB600-41532	RRID:AB_805588	1:400	IF tissue and organoids
Rabbit monoclonal anti-Radixin (C4G7)	Cell Signaling	# 2636	RRID:AB_2238294	1:200	IF tissue
Rabbit polyclonal anti-Cytokeratin	Dako	# Z0622	RRID:AB_2650434	1:200	IF tissue and organoids
Rabbit monoclonal anti‑Hnf‑4‑alfa (EPR16885)	Abcam	# ab181604	RRID:AB_2890918	1:200	IF tissue and organoids
Rabbit monoclonal anti‑SOX9 (EPR14335-78)	Abcam	# ab185966	RRID:AB_2728660	1:200	IF tissue and organoids
Goat anti-Osteopontin Polyclonal	R&D Systems	# AF808	RRID: AB_2194992	1:200	IF tissue and organoids
Rat CD34 Monoclonal Antibody (RAM34), eBioscience™	ThermoFisher Scientific	# 14-0341-85	RRID:AB_467211	1:100	IF tissue
Rabbit anti-Cleaved Caspase-3 (Asp175) monoclonal (Clone 5A1E)	Cell Signaling Technology	# 9664	RRID: AB_2070042	1:100	IF organoids
Rat Purified anti-mouse Ly-6A/E (Sca-1)	BioLegend	# 108102	RRID:AB_313339	1:100	IF organoids
Rabbit Polyclonal Transcription Factor Sox-9 Antibody	Millipore	# AB5535	RRID:AB_2239761	1:200	IF tissue and organoids
Mouse monoclonal anti-Vimentin (clone LN-6)	Merck	# V2258	RRID:AB_261856	1:500	IF organoids
Rat anti-Ly-6A/E (Sca-1) monoclonal (Clone D7), Super Bright 436	ThermoFisher Scientific	# 62-5981-82	RRID: AB_2637287	1:100	FACS sorting
Rat anti- CD326 (EpCAM) monoclonal (Clone G8.8), APC	ThermoFisher Scientific	# 17-5791-80	RRID: AB_2734965	1:100	FACS sorting
Rat anti-CD11b monoclonal (Clone M1/70), PE-Cy7	BD Biosciences	# 552850	RRID: AB_394491	1:100	FACS sorting
Rat anti-CD31 monoclonal (Clone 390), PE-Cy7	BD Biosciences	# 561410	RRID: AB_10612003	1:100	FACS sorting
Rat anti-CD45 monoclonal (Clone 30-F11), PE-Cy7	BD Biosciences	# 552848	RRID: AB_394489	1:100	FACS sorting
Rabbit anti-Elastin (polyclonal IgG)	Cedarlane Laboratories Limited	#CL55041AP	RRID: AB_10061195	1:100	IF organoids
Rabbit polyclonal anti-Glutamine Synthetase (GS)	Sigma-Aldrich	# G2781	RRID: AB_259853	1:500	IF tissue and organoids
Rabbit polyclonal anti-Cytochrome P450 2E1 (CYP2E1)	Abcam	# ab28146	RRID: AB_2089985	1:200	IF tissue and organoids
Rabbit anti-Ki67 monoclonal (Clone SP6)	ThermoFisher Scientific	#RM 9106 S1	RRID:AB_2341197	1:200	IF organoids
Secondary antibodies	Company	Catalogue number	Identifier	Dilution	Method
Donkey anti-Rat IgG (H+L) Highly Cross-Adsorbed Secondary Antibody, Alexa Fluor 488	ThermoFisher Scientific	# A-21208	RRID:AB_2535794	1:250-1:1000	IF tissue and organoids
Donkey anti-Rat IgG (H+L) Highly Cross-Adsorbed Secondary Antibody, Alexa Fluor Plus 555	ThermoFisher Scientific	# A48270	RRID:AB_2896336	1:250-1:1000	IF tissue and organoids
Donkey anti-Rat IgG (H+L) Highly Cross-Adsorbed Secondary Antibody, Alexa Fluor 594	ThermoFisher Scientific	# A-21209	RRID:AB_2535795	1:250 - 1:1000	IF tissue and organoids
Goat anti-Rat IgG (H+L) Cross-Adsorbed Secondary Antibody, Alexa Fluor 647	ThermoFisher Scientific	# A-21247	RRID:AB_141778	1:250	IF tissue and organoids
Goat anti-Rabbit IgG (H+L) Cross-Adsorbed Secondary Antibody, Alexa Fluor 532	ThermoFisher Scientific	# A-11009	RRID:AB_2534076	1:250	IF tissue and organoids
Anti-Rabbit IgG (H+L), highly cross-adsorbed, CF™ 633 antibody produced in donkey	Merck	# SAB4600132	/	1:250	IF tissue and organoids
Donkey anti-Rabbit IgG (H+L) Highly Cross-Adsorbed Secondary Antibody, Alexa Fluor 647	ThermoFisher Scientific	# A-31573	RRID:AB_2536183	1:250 - 1:1000	IF tissue and organoids
Donkey Anti-Mouse IgG (H+L) Polyclonal Antibody, Alexa Fluor 647 Conjugated	ThermoFisher Scientific	# A-31571	RRID:AB_162542	1:250	IF tissue and organoids
Donkey anti-Goat IgG (H+L) Cross-Adsorbed Secondary Antibody, Alexa Fluor 594	ThermoFisher Scientific	# A-11058	RRID:AB_2534105	1:250 - 1:1000	IF tissue and organoids
Donkey anti-Goat IgG (H+L) Cross-Adsorbed Secondary Antibody, Alexa Fluor 647	ThermoFisher Scientific	# A-21447	RRID:AB_2535864	1:1000	IF tissue and organoids
Donkey Anti-Rat IgG (H+L), Highly Cross-Adsorbed, CF 568	Biotium	# 20092	RRID:AB_10855000	1:1000	IF tissue and organoids
Dyes	Company	Catalogue number	Identifier	Dilution	Method
SiR-Actin	Spirochrome	# SC001	/	1:500-1:1000	live imaging
Corning® Cholyl-Lysyl-Fluorescein (CLF)	Corning	# 451041	/	10ug/ml	live imaging
SPY620-DNA	Spirochrome	# SC401	/	1:1000-1:2000	live imaging
DAPI	BD Biosciences	# BD564907	/	1:500 - 1:1000	IF tissue and organoids
Phalloidin 647	ThermoFisher Scientific	# A22287	/	1:250-1:400	IF tissue and organoids
Phalloidin 488	ThermoFisher Scientific	# A12379	/	1:250	IF tissue and organoids
CellTracker™ Green CMFDA Dye (Chloromethylfluorescein diacetate)	ThermoFisher Scientific	#C2925	/	5uM	live imaging
16:0-06:0 NBD PC fluorescent lipid (phosphatidylcholine)	Avanti Polar lipids, Merck	#810130P-1mg	/	4uM	live imaging
5-CFDA, AM (5-Carboxyfluorescein Diacetate, Acetoxymethyl Ester)	ThermoFisher Scientific	#C1354	/	5uM	live imaging
SPY555 DNA	Spirochrome	#SC201	/	1:1000-1:2000	live imaging

## Sheet: Suppl.Table 1-2 Primers
Supplementary Table 1-2. List of RT-qPCR primers
Gene symbol	Gene name	Species	Forward primer	Reverse primer
18S	18S ribosomal RNA	Mouse	CCCCTCGATGCTCTTAGCTG	GAACCGCGGTCCTATTCCAT
Abcb11	ATP binding cassette subfamily B member 11	Mouse	AATTCACATCTGTAGGGTTGTTG	CAAAGAAGCCAACTCGAGCG
Alb	Albumin	Mouse	GCGCAGATGACAGGGCGGAA	GTGCCGTAGCATGCGGGAGG
Anpep	Alanyl aminopeptidase, membrane; CD13	Mouse	TCAACCTGGCCAGTGCTAAAA	AGAGGGGCGTAACTTGCTTC
Cdh1	Cadherin 1; E-cadherin	Mouse	AGGGAGCTGTCTACCAAAGTG	CCAGTCTCGTTTCTGTCTTC
Cyp2e1	Cytochrome P450, family 2, subfamily e, polypeptide 1	Mouse	CCCATCATTATCCCTTAC	AGTCAGATCTCGATACAG
Cyp3a11	Cytochrome P450, family 3, subfamily a, polypeptide 11	Mouse	CCTTCCAGCCTTGTAAGGAA	CCGTGGCACAACCTTTAGAA
Dpp4	Dipeptidylpeptidase 4	Mouse	CATGGAACGGCAGATGATAATG	GTGGTCTTCATCCGTGTACCA
Hnf4a	Hepatic nuclear factor 4, alpha	Mouse	GCCTCAAAGCCATCATCTTC	CCGGTCGTTGATGTAATCCT
Krt19	Keratin 19	Mouse	GGACCCTCCCGAGATTACAAC	GTGTTCTGTCTCAAACTTGGTTCT
Mrp2/Abcc2	Multidrug resistance-associated protein 2/ ATP-binding cassette, sub-family member 2	Mouse	CTGCAACTCTACTTTTTGGAATCT	AAGCCCAAGGGAATCCACAC
Sox9	SRY (sex determining region Y)-box 9	Mouse	AGAAAGACCACCCCGATTACAAGT	CGGCGGACCCTGAGATTG
Ki67	Marker Of Proliferation Ki-67	Mouse	CCTTTGCTGTCCCCGAAGA	GGCTTCTCATCTGTTGCTTCCT
Afp	Alpha fetoprotein	Mouse	AGCGAGGAGAAATGGTCCGG	GGACATCTTCACCATGTGG
Pdgfra	Platelet derived growth factor receptor alpha	Mouse	GTCTCAGGAGCTATGGGGAC	CGTTTGGGAGGATAGAGGGT
Vim	Vimentin	Mouse	CTGCACGATGAAGAGATCCAG	ACTCGTTTGACTCCTGCTTG
Cdh11	Cadherin 11	Mouse	CCTGGCTCAACATCTCTGTCT	GCACTAACTGTAACTATTGGCTGG
Krt7	Keratin 7	Mouse	CGAGCAGATCAAGACCCTCA	TCTTGGCTGACTTCTGTTCCT
Itgb1	Integrin subunit beta 1	Mouse	TCCGGCCAGAAGACATTACTC	AAATGAGCCAAAGCCAATGCG
Acta2	Actin alpha 2, smooth muscle	Mouse	AGCCATCTTTCATTGGGATGG	CCCCTGACAGGACGTTGTTA
Col1a1	Collagen type I alpha 1 chain	Mouse	CCCAAGGAAAAGAAGCACGT	GCAGGAAGGTCAGCTGGATA
Col1a2	Collagen type I alpha 2 chain	Mouse	ATACGCGGACTCTGTTGCTG	CCCTTTCGTACTGATCCCGATT
Lum	Lumican	Mouse	GTGTCAAGAGAGTAAGGTCACA	CTGTGGGGGCAGTTACATTCT
Ccl11	C-C motif chemokine ligand 11	Mouse	AGAGCCTACAGAGCCCAGAG	GGGATGGAGCCTGGGTGA

## Sheet: Suppl.Table 1-3 Kits
Supplementary Table 1-3. List of commercial kits
Kit name	Company	Catalogue number
Viability/Cytotoxicity Assay Kit for Animal Live & Dead Cells	Biotium	# 30002
Mouse Albumin AssayMax ELISA Kit	Assaypro	# EMA3201-1
Total Bile Acid Assay Kit (Colorimetric)	Cell Biolabs Inc.	# STA-631
PicoPure™ RNA Isolation Kit	ThermoFisher Scientific	# KIT0204
Proteome Profiler Mouse XL Cytokine Array	R&D systems Biotechne	# ARY028
FastStart Essential DNA Green Master	Roche	# 06402712001
RNAscope® Multiplex Fluorescent Detection Kit v2	ACD Biotechne	#323100
P450-Glo™ CYP1A2 Induction/Inhibition Assay	Promega	#V8421
P450-Glo™ CYP3A4 Assay and Screening System, Luciferin IPA	Promega	#V9001
CellTiter-Glo® 3D Cell Viability Assay	Promega	#G968A
PowerUp™ SYBR™ Green Master Mix	ThermoFisher Scientific	#A25741

## Sheet: Suppl.Table 1-4 RNAscope
Supplementary Table 1-4. List of RNAscope reagents
Probe	Company	Catalogue number	Dilution
RNAscope™ Probe- Mm-Gls2-C3	ACD, Biotechne	449281-C3	50x
RNAscope™ Probe- Mm-Alb	ACD, Biotechne	437691	1x
RNAscope™ Probe- Mm-Cyp1a1-C2	ACD, Biotechne	464611-C2	50x
Detection fluorophorore	Company	Catalogue number	Dilution
TSA Vivid Fluorophore 520	Tocris, Biotechne	323271	1:750
TSA Vivid Fluorophore 570	Tocris, Biotechne	323272	1:750
TSA Vivid Fluorophore 650	Tocris, Biotechne	323273	1:750

## Sheet: Suppl.Table 1-5 siRNAsequences
Supplementary Table 1-5. List of siRNA sequences
Pool Catalog Number	Duplex Catalog Number	Gene Symbol	GENE ID	Gene Accession	GI Number	Sequence
L-053105-00	J-053105-05	Cdh11	12552	NM_009866	47059027	GCUUAUAGCUUGAAGAUAG
L-053105-00	J-053105-06	Cdh11	12552	NM_009866	47059027	AGAUAACACUGCAGGAGUA
L-053105-00	J-053105-07	Cdh11	12552	NM_009866	47059027	GGUCAUCGUUGUGCUGUUU
L-053105-00	J-053105-08	Cdh11	12552	NM_009866	47059027	CAAUUGAUCGUCAUACUGA
L-040206-00	J-040206-05	Cdh2	12558	NM_007664	75677425	GAUCAAAGCCUGGGACGUA
L-040206-00	J-040206-06	Cdh2	12558	NM_007664	75677425	GUGCAACAGUAUACGUUAA
L-040206-00	J-040206-07	Cdh2	12558	NM_007664	75677425	CAGAGAAUCGCCAAAUGUA
L-040206-00	J-040206-08	Cdh2	12558	NM_007664	75677425	GGACAGGAACACUGCAAAU
L-043153-01	J-043153-09	Mmp3	17392	NM_010809	6754713	CUGCAUAUGAGGUUACUAA
L-043153-01	J-043153-10	Mmp3	17392	NM_010809	6754713	CGAUGAUGAACGAUGGACA
L-043153-01	J-043153-11	Mmp3	17392	NM_010809	6754713	AGUCUUGGCUCAUGCCUAU
L-043153-01	J-043153-12	Mmp3	17392	NM_010809	6754713	CAUCCUACCCAUUGCAUGA

## Sheet: Suppl.Table 1-6 Cytokines
Supplementary Table 1-6. List of cytokines
Cytokine	Company	Catalogue number	Concentration
Recombinant Mouse CXCL1/KC Protein	R&D Systems, Biotechne	453-KC-010	100ng/ml
Recombinant Mouse CCL11/Eotaxin Protein	R&D Systems, Biotechne	420-ME-020	100ng/ml
Recombinant Mouse CXCL12/SDF-1 alpha Protein	R&D Systems, Biotechne	460-SD-010	100ng/ml

## Sheet: Suppl.Table1-7 Block.antibodies
Supplementary Table 1-7. List of blocking antibodies
Antibody	Company	Catalogue number	Identifier	Dilution
Normal Goat IgG Control	R&D Systems, Biotechne	#AB-108-C	RRID:AB_354267	1-4ug/ml
Normal Rat IgG Control (Azide Free)	R&D Systems, Biotechne	#6-001-F	RRID:AB_2616570	1-10ug/ml
Mouse IgG1 Isotype Control	R&D Systems, Biotechne	#MAB002	RRID:AB_357344	1-10ug/ml
Mouse uPAR Antibody	R&D Systems, Biotechne	#AF534-SP	RRID:AB_2165351	1-4ug/ml
Human/Mouse TNF-alpha Antibody	R&D Systems, Biotechne	#AF410-SP	RRID:AB_354479	1-4ug/ml
Mouse CX3CL1/Fractalkine Chemokine Domain Antibody	R&D Systems, Biotechne	#AF472-SP	RRID:AB_2276839	1-4ug/ml
Mouse CCL11/Eotaxin Antibody	R&D Systems, Biotechne	#AF420-SP	RRID:AB_354486	1-4ug/ml
Human/Mouse CXCL12/SDF-1 Antibody	R&D Systems, Biotechne	#MAB310-SP	RRID:AB_2276927	1-4ug/ml
BD Pharmingen™ Purified Rat Anti-Mouse CD47 Clone miap301, unlabelled	BD Biosciences	#555297	RRID:AB_395713	1-10ug/ml
Human/Mouse CXCL12/SDF-1 Antibody	R&D Systems, Biotechne	#MAB310-SP	RRID:AB_2276927	10ug/ml
Mouse TIMP-1 Antibody	R&D Systems, Biotechne	#AF980-SP	RRID:AB_355759	1-4ug/ml
Human/Mouse TIMP-2 Antibody	R&D Systems, Biotechne	#AF971-SP	RRID:AB_355752	1-4ug/ml
Mouse Osteopontin/OPN Antibody	R&D Systems, Biotechne	#AF808-SP	RRID:AB_2194992	1-4ug/ml
Mouse CXCL1/GRO alpha /KC/CINC-1 Antibody	R&D Systems, Biotechne	#AF-453-SP	RRID:AB_354495	1-4ug/ml
